# Supplementary material for: Long-Term Survivorship of Cervical Spine Procedures; A Survivorship Meta-Analysis and Meta-Regression
Source: PubMed Central journal article supplement — Global Spine J. 2022 Sep 7;13(3):840–54. doi: 10.1177/21925682221125766 (PMC10240585; doi:10.1177/21925682221125766), 2022-09-07
Supplement: sj-pdf-1-gsj-10.1177_21925682221125766.pdf [file sj-pdf-1-gsj-10.1177_21925682221125766.pdf]

## APPENDIX 1: SEARCH STRATEGIES

*MEDLINE (January 1946-March 9 2021) [3939]*

((((exp Cervical Vertebrae/ or exp Cervical Cord/ or cervical.mp. or (phrenic nucleus or accessory nucleus).mp. or ("Japanese Orthopedic Association" adj2 score\*) or (joa adj2 score\*)).mp.) and (myelopath\*.mp. or exp Spinal Cord Diseases/ or (spinal cord adj3 (diseas\* or disorder\*)).mp. or myeloradiculopath\*.mp. or spondylomyelopath\*.mp. or spondylomyeloradiculopath\*.mp. or (Spinal Cord adj3 Compress\*).mp. or exp Spinal Cord Compression/) or exp "Ossification of Posterior Longitudinal Ligament"/ ) not (exp Atlanto-Occipital Joint/ or exp Arteriovenous Fistula/ or exp Radiotherapy/ or exp Vitamin B 12/ or exp Radiation/ or exp Radiation Injuries/ or exp Re-Irradiation/ or exp Craniospinal Irradiation/ or exp Whole-Body Irradiation/ or exp Motor Neuron Disease/ or exp Amyotrophic Lateral Sclerosis/ or exp Neoplasm Metastasis/ or exp Hemangioma/ or exp neoplasm/ or exp metastasis/ or exp Nervous System Malformations/ or exp "autoimmune diseases of the nervous system"/ or exp "congenital, hereditary, and neonatal diseases and abnormalities"/ or exp virus diseases/ )) and (Cohort Studies/ or incidence.tw. or exp disease progression/ or exp clinical deterioration/ or Follow-Up Studies/ or prognos\*.tw. or predict\*.tw. or course.tw. or Survival Analysis/)) not (exp animals/ not humans.sh.) not ((exp infant/ or exp child/ or adolescent/) not (exp adult/))

*EMBASE (January 1974-March 9 2021) [4976]*

((((exp Cervical Vertebra/ or exp Cervical Spinal Cord/ or cervical.mp. or (phrenic nucleus or accessory nucleus).mp. or ("Japanese Orthopedic Association" adj2 score\*) or (joa adj2 score\*)).mp.) and (myelopath\*.mp. or exp Spinal Cord Disease/ or (spinal cord adj3 (diseas\* or disorder\*)).mp. or myeloradiculopath\*.mp. or spondylomyelopath\*.mp. or spondylomyeloradiculopath\*.mp. or (Spinal Cord adj3 Compress\*).mp. or exp Spinal Cord Compression/)) not (exp Atlantooccipital Joint/ or exp Arteriovenous Fistula/ or exp Radiotherapy/ or exp Cyanocobalamin/ or exp Radiation/ or exp Radiation Injury/ or exp Re-Irradiation/ or exp Craniospinal Irradiation/ or exp Whole Body Irradiation/ or exp Motor Neuron Disease/ or exp Amyotrophic Lateral Sclerosis/ or exp Hemangioma/ or exp neoplasm/ or exp metastasis/ or exp Nervous System Malformations/ or autoimmune disease/ or exp congenital disorder/ or exp genetic disorder/ or exp virus infection/ )) and (cohort analysis/ or incidence.tw. or exp disease exacerbation/ or exp deterioration/ or prognos\*.tw. or predict\*.tw. or course.tw. or Survival Analysis/)) not ((exp animal/ or animal experiment/ or nonhuman/) not (exp human/ or human experiment/)) not (exp juvenile/ not exp adult/)

*CENTRAL (on February 22 2021) [655]*

- #1 MeSH descriptor Neck, this term only
- #2 MeSH descriptor Neck Injuries explode all trees
- #3 MeSH descriptor Whiplash Injuries, this term only
- #4 MeSH descriptor Neck Muscles, this term only
- #5 MeSH descriptor Neck Pain, this term only
- #6 (neck)
- #7 (whiplash)
- #8 MeSH descriptor Cervical Vertebrae explode all trees

- #9 (#1 OR #2 OR #3 OR #4 OR #5 OR #6 OR #7 OR #8)
- #10 MeSH descriptor Spinal Cord Compression explode all trees
- #11 MeSH descriptor Spinal Osteophytosis explode all trees
- #12 MeSH descriptor Spinal Nerve Roots explode all trees
- #13 MeSH descriptor Radiculopathy explode all trees
- #14 Radiculopathy
- #15 myelopathy
- #16 radiculomyelopathy
- #17 myeloradiculopathy
- #18 (#10 OR #11 OR #12 OR #13 OR #14 OR #15 OR #16 OR #17)
- #24 (#9 AND #18)
